# Supplementary material
Source: publisher figshare collection journal article supplement (https://frontiersin.figshare.com/ndownloader/files/34040426)
Supplement: Supplementary file [file 34040426]

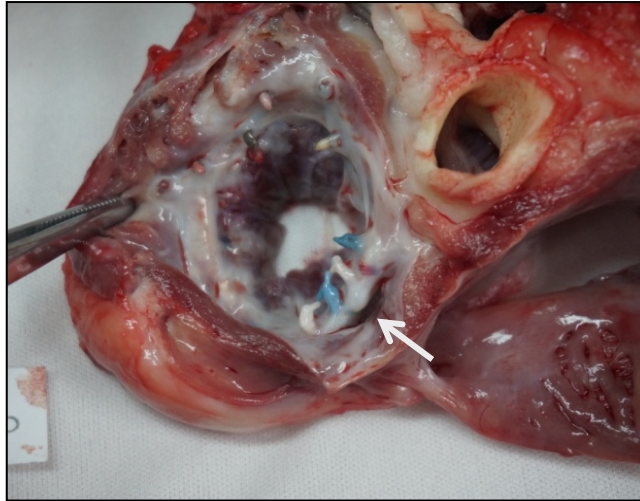

**Figure S1. A peri-leakage aside a manual-tying knot at Day 90 (↑).**

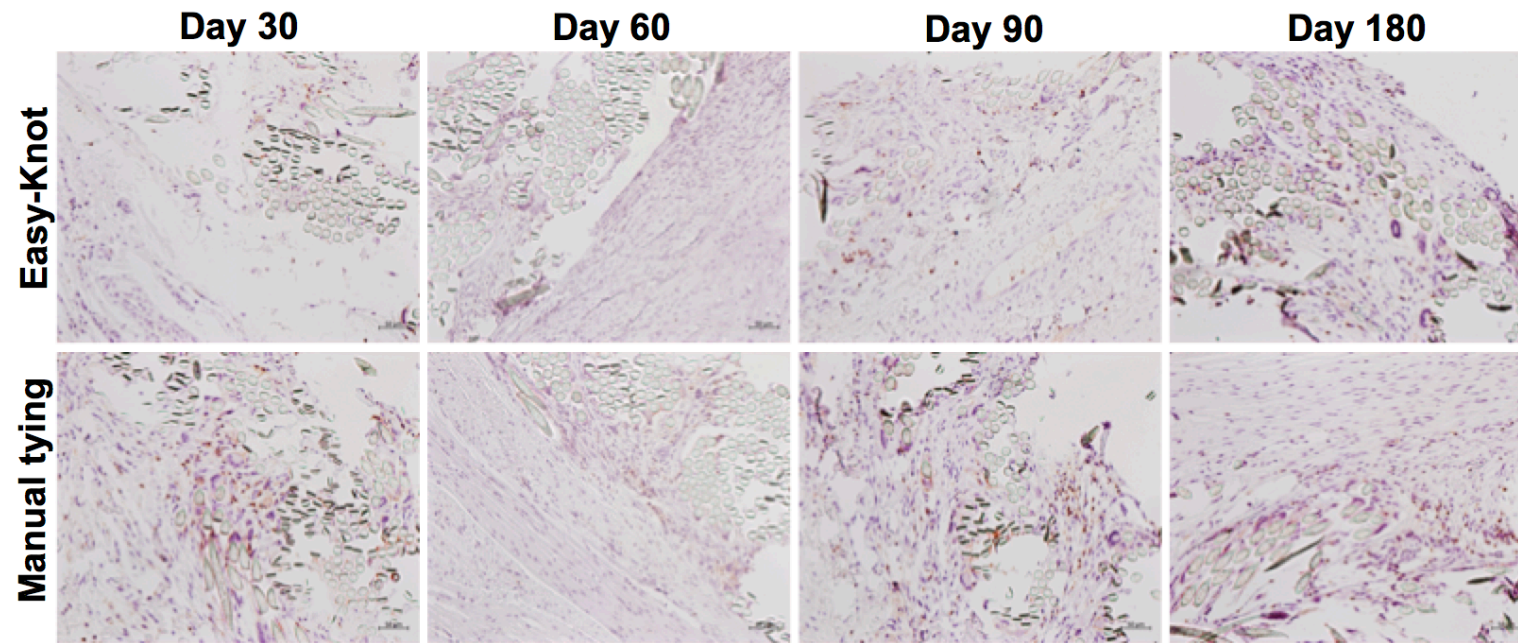

**Figure S2. Representative IHC images of tissue around the annuloplasty ring at indicated time points for inflammatory reaction analysis. \*,  $P < 0.05$ .**
